# Supplementary material for: Substituting Lean Beef for Carbohydrate in a Healthy Dietary Pattern Does Not Adversely Affect the Cardiometabolic Risk Factor Profile in Men and Women at Risk for Type 2 Diabetes
Source: PubMed Central journal article supplement — J Nutr. 2020 May 2;150(7):1824–33. doi: 10.1093/jn/nxaa116 (PMC7330462; doi:10.1093/jn/nxaa116), 2020-05-02
Supplement: nxaa116_supplemental_file.pdf [file nxaa116_supplemental_file.pdf]

**Supplementary Table 1. Nutrient content and food group servings from a sample 2400 kcal daily menu during the USDA-CON and USDA-LB conditions.<sup>1,2</sup>**

| Parameter                           | USDA-CON                                                                                                                                    | USDA-LB                                                                                                                                   |
|-------------------------------------|---------------------------------------------------------------------------------------------------------------------------------------------|-------------------------------------------------------------------------------------------------------------------------------------------|
| Breakfast Menu                      | <i>Sprouted Everything Bagel w/Egg Whites, Turkey Sausage &amp; Grilled Asparagus, Dark Chocolate Cherry Scones &amp; Fruit Salad</i>       | <i>Sprouted Everything Bagel w/Egg Whites, Turkey Sausage &amp; Grilled Asparagus, Dark Chocolate Cherry Scones &amp; Fruit Salad</i>     |
| Lunch Menu                          | <i>Caper &amp; Rosemary Grilled Corvina, Purple Peruvian Potatoes, <b>Cheesy Baked Rotini</b> &amp; Grilled Zucchini Tomato Onion Salad</i> | <i>Caper &amp; Rosemary Grilled Corvina, Purple Peruvian Potatoes, <b>Beef Baked Rotini</b> &amp; Grilled Zucchini Tomato Onion Salad</i> |
| Dinner Menu                         | <i><b>Perfect Baked Potato</b> &amp; Vegetable Salad</i>                                                                                    | <i><b>Grilled Steak</b> &amp; Vegetable Salad</i>                                                                                         |
| Snacks                              | <i>Edamame, Diced Peaches in Gel &amp; Whole Grain Crackers</i>                                                                             | <i>Edamame, Diced Peaches in Gel &amp; Whole Grain Crackers</i>                                                                           |
| <b>Nutrient Content</b>             |                                                                                                                                             |                                                                                                                                           |
| Energy, kcal/d                      | 2370                                                                                                                                        | 2380                                                                                                                                      |
| CHO, % of energy                    | 49.2                                                                                                                                        | 42.4                                                                                                                                      |
| <i>Sugar, % of energy</i>           | 13.4                                                                                                                                        | 12.1                                                                                                                                      |
| Protein, % of energy                | 18.1                                                                                                                                        | 24.0                                                                                                                                      |
| Total fat, % of energy              | 35.6                                                                                                                                        | 35.9                                                                                                                                      |
| <i>SFA, % of energy</i>             | 8.4                                                                                                                                         | 7.9                                                                                                                                       |
| <i>UFA, % of energy</i>             | 27.2                                                                                                                                        | 28.0                                                                                                                                      |
| Dietary fiber, g/d                  | 41.6                                                                                                                                        | 43.0                                                                                                                                      |
| Cholesterol, mg/d                   | 167                                                                                                                                         | 262                                                                                                                                       |
| Sodium, mg/d                        | 3040                                                                                                                                        | 3200                                                                                                                                      |
| Calcium, mg/d                       | 707                                                                                                                                         | 648                                                                                                                                       |
| Magnesium, mg/d                     | 339                                                                                                                                         | 344                                                                                                                                       |
| <b>Food Groups (serving/d)</b>      |                                                                                                                                             |                                                                                                                                           |
| Fruit (cups)                        | 2                                                                                                                                           | 2                                                                                                                                         |
| Vegetables (cups)                   | 4                                                                                                                                           | 3.5                                                                                                                                       |
| Dairy foods (cups)                  | 1                                                                                                                                           | 0.5                                                                                                                                       |
| Protein foods                       |                                                                                                                                             |                                                                                                                                           |
| <i>Legumes, nuts, seeds (oz-eq)</i> | 3                                                                                                                                           | 3                                                                                                                                         |
| <i>Poultry, pork, fish (oz-eq)</i>  | 6                                                                                                                                           | 6                                                                                                                                         |
| <i>Eggs (oz-eq)</i>                 | 1                                                                                                                                           | 1                                                                                                                                         |
| <i>Beef (oz-eq)</i>                 | 0                                                                                                                                           | 4                                                                                                                                         |
| Grains (oz-eq)                      | 8                                                                                                                                           | 7                                                                                                                                         |
| Fats, oils (g)                      | 30                                                                                                                                          | 30                                                                                                                                        |

<sup>1</sup>Metric conversions: 1 cup = 250 mL; 1 oz = 30 g.

<sup>2</sup>CHO, carbohydrates; SFA, saturated fatty acids; UFA, unsaturated fatty acids; USDA-CON, a USDA Healthy U.S.-Style Eating Pattern, as outlined by the 2015 Dietary Guidelines for Americans (5), containing <40 g/d red meat; USDA-LB, a USDA Healthy U.S.-Style Eating Pattern, as outlined by the 2015 Dietary Guidelines for Americans (5), modified to incorporate an additional 150 g/d of fresh/unprocessed lean beef to that of the USDA-CON diet, in place of CHO, primarily refined starches.
